# Supplementary material for: Cooperation and interplay between base and nucleotide excision repair pathways: From DNA lesions to proteins
Source: PubMed Central journal article supplement (PMC7198027; doi:10.1590/1678-4685-gmb-2019-0104), 2020-03-02
Supplement: 1415-4757-GMB-43-1-s1-e20190104-suppl1.pdf [file 1415-4757-GMB-43-1-s1-e20190104-suppl1.pdf]

**Supplementary material to**  
**“Cooperation and interplay between base and nucleotide excision repair**  
**pathways: From DNA lesions to proteins”**

**Table S1** - All BER X NER interactions found in the interactome.

| Source protein | Interacting partners                                                                                                          |
|----------------|-------------------------------------------------------------------------------------------------------------------------------|
| <b>RAD23B</b>  | DDB2<br>RPA3<br>ERCC1<br>GTF2H2<br>CDK7<br>DDB1<br>GTF2H4<br>RBX1<br>RPA1<br>GTF2H1<br>XPC<br>MPG<br>CSA<br>XPG<br>XPF<br>XPB |
| <b>LIG1</b>    | RBX1<br>GTF2H4<br>CDK7<br>RPA3<br>RPA1<br>POLK<br>APEX1                                                                       |
| <b>GTF2H1</b>  | GTF2H4<br>CDK7<br>DDB2<br>RPA3<br>LIG1<br>POLK<br>RBX1<br>XRCC1<br>ERCC1<br>RPA1<br>CSA<br>POLD3                              |

| Source protein | Interacting partners                                                                                                                                                                                        |
|----------------|-------------------------------------------------------------------------------------------------------------------------------------------------------------------------------------------------------------|
| XPA            | RPA3<br>CETN2<br>GTF2H4<br>RBX1<br>PARP1<br>GTF2H2<br>CDK7<br>POLE<br>POLK<br>XAB2<br>RAD23B<br>DDB1<br>DDB2<br>RPA1<br>XPC<br>RPA2<br>GTF2H1<br>ERCC1<br>CSB<br>CSA<br>XPB<br>XPG<br>XPF<br>POLD4<br>POLD3 |
| CDK7           | POLK<br>ERCC1<br>RBX1<br>RPA1<br>RPA3                                                                                                                                                                       |
| XRCC1          | RBX1<br>CDK7<br>GTF2H4<br>RPA3<br>POLK<br>RPA1<br>APEX1                                                                                                                                                     |
| LIG3           | PARP1<br>GTF2H4<br>GTF2H2<br>DDB1<br>RBX1<br>GTF2H1<br>CDK7<br>RPA3<br>CUL4A<br>POLK<br>POLE<br>RPA2                                                                                                        |

| Source protein | Interacting partners                                                                                                                                       |
|----------------|------------------------------------------------------------------------------------------------------------------------------------------------------------|
|                | XAB2<br>RPA1<br>XRCC1<br>CSA<br>NEIL2<br>XPB<br>PNKP<br>FEN1<br>NEIL1<br>POLB<br>POLD4<br>POLD3                                                            |
| RPA1           | RPA3<br>RBX1<br>POLK<br>ERCC1<br>APEX1                                                                                                                     |
| XAB2           | RPA3<br>ERCC1<br>RBX1<br>POLK<br>RPA1<br>GTF2H2<br>LIG1<br>CDK7<br>POLE<br>GTF2H1<br>GTF2H4<br>DDB1<br>XRCC1<br>XPB<br>XPG<br>XPF<br>CSA<br>POLD4<br>POLD3 |
| RPA3           | RBX1<br>ERCC1<br>APEX1                                                                                                                                     |
| RPA2           | RPA3<br>RPA1<br>POLK<br>XAB2<br>RAD23B<br>GTF2H2<br>RBX1<br>GTF2H4<br>DDB1<br>POLE                                                                         |

| Source protein | Interacting partners                                                                                                                                                                                            |
|----------------|-----------------------------------------------------------------------------------------------------------------------------------------------------------------------------------------------------------------|
|                | <p>XRCC1<br/> ERCC1<br/> DDB2<br/> GTF2H1<br/> LIG1<br/> CETN2<br/> XPC<br/> PARP1<br/> CDK7<br/> UNG<br/> POLB<br/> XPF<br/> CSA<br/> XPB<br/> XPG<br/> APEX1<br/> FEN1<br/> POLD4<br/> POLD3</p>              |
| <p>POLE</p>    | <p>GTF2H4<br/> DDB2<br/> CDK7<br/> RBX1<br/> GTF2H1<br/> RPA3<br/> XRCC1<br/> ERCC1<br/> POLK<br/> DDB1<br/> RPA1<br/> LIG1<br/> CSA<br/> XPB<br/> POLB<br/> APEX1<br/> XPF<br/> FEN1<br/> POLD4<br/> POLD3</p> |

| Source protein | Interacting partners                                                                                                                                                                                                                                                                    |
|----------------|-----------------------------------------------------------------------------------------------------------------------------------------------------------------------------------------------------------------------------------------------------------------------------------------|
| GTF2H5         | GTF2H3<br>GTF2H4<br>XRCC1<br>LIG1<br>XPA<br>PCNA<br>CUL4A<br>POLK<br>XPC<br>DDB1<br>PARP1<br>DDB2<br>RFC1<br>LIG3<br>XAB2<br>RPA1<br>POLE<br>RPA2<br>ERCC1<br>CETN2<br>RAD23B<br>RBX1<br>RPA3<br>CDK7<br>XPD<br>GTF2H2<br>GTF2H1<br>XPF<br>CSA<br>XPG<br>XPB<br>POLD4<br>POLD3<br>POLD1 |

| Source protein                            | Interacting partners                                                                                                                                                                                                                                                                                                                                                                                                                                                                                                                                                                                                                                                                                                                                                                                                                                                                                                                                                                        |
|-------------------------------------------|---------------------------------------------------------------------------------------------------------------------------------------------------------------------------------------------------------------------------------------------------------------------------------------------------------------------------------------------------------------------------------------------------------------------------------------------------------------------------------------------------------------------------------------------------------------------------------------------------------------------------------------------------------------------------------------------------------------------------------------------------------------------------------------------------------------------------------------------------------------------------------------------------------------------------------------------------------------------------------------------|
| <p style="text-align: center;">GTF2H3</p> | <p>GTF2H4<br/>                     XPD<br/>                     GTF2H2<br/>                     GTF2H1<br/>                     XPA<br/>                     PARP1<br/>                     XRCC1<br/>                     RAD23B<br/>                     LIG1<br/>                     RBX1<br/>                     POLK<br/>                     CUL4A<br/>                     RFC1<br/>                     LIG3<br/>                     POLE<br/>                     ERCC1<br/>                     XAB2<br/>                     DDB1<br/>                     DDB2<br/>                     CETN2<br/>                     PCNA<br/>                     RPA3<br/>                     RPA2<br/>                     RPA1 XPC<br/>                     CDK7<br/>                     XPG<br/>                     CSA<br/>                     XPF<br/>                     XPB<br/>                     POLD4<br/>                     POLD3<br/>                     POLD1</p> |
| <p style="text-align: center;">XPD</p>    | <p>GTF2H2<br/>                     GTF2H1<br/>                     RPA3<br/>                     DDB2<br/>                     CETN2<br/>                     RPA2<br/>                     CUL4A<br/>                     RBX1<br/>                     ERCC1<br/>                     RAD23B<br/>                     LIG3<br/>                     RPA1<br/>                     PARP1<br/>                     XRCC1<br/>                     POLK XPC<br/>                     POLE<br/>                     XAB2<br/>                     DDB1</p>                                                                                                                                                                                                                                                                                                                                                                                                                                    |

| Source protein | Interacting partners                                                                                                                                     |
|----------------|----------------------------------------------------------------------------------------------------------------------------------------------------------|
|                | XPA<br>LIG1<br>PCNA<br>RFC1<br>GTF2H4<br>CDK7<br>POLD4<br>POLD3                                                                                          |
| DDB2           | CDK7<br>ERCC1<br>RPA3<br>POLK<br>RPA1<br>RBX1                                                                                                            |
| GTF2H2         | GTF2H1<br>GTF2H4<br>RPA3<br>XRCC1<br>ERCC1<br>POLK<br>LIG1<br>DDB2<br>RPA1<br>RBX1<br>POLE<br>XPC<br>DDB1<br>CDK7<br>XPF<br>CSA<br>XPB<br>POLD4<br>POLD3 |
| RFC1           | DDB2<br>GTF2H4<br>XPA<br>POLK<br>GTF2H1<br>XRCC1<br>RBX1<br>CUL4A<br>DDB1<br>GTF2H2<br>RPA3<br>XAB2<br>ERCC1<br>CDK7<br>PARP1<br>RPA2                    |

| Source protein | Interacting partners                                                                                                                              |
|----------------|---------------------------------------------------------------------------------------------------------------------------------------------------|
|                | LIG3<br>RPA1<br>POLE<br>LIG1<br>PCNA<br>POLB<br>CSA<br>XPB<br>APEX1<br>XPF<br>XPG<br>FEN1<br>POLD4<br>POLD3                                       |
| GTF2H4         | RPA3<br>ERCC1<br>POLK<br>RPA1<br>RBX1<br>DDB2<br>CDK7                                                                                             |
| XPC            | RPA3<br>RBX1<br>ERCC1<br>CDK7<br>GTF2H4<br>DDB2<br>RPA1<br>GTF2H1<br>POLB<br>CSA                                                                  |
| CETN2          | PARP1<br>GTF2H1<br>DDB2<br>CDK7<br>ERCC1<br>RPA1<br>GTF2H4<br>DDB1<br>RPA3<br>GTF2H2<br>RBX1<br>RAD23B<br>XPC<br>POLB<br>CSA<br>XPB<br>XPG<br>XPF |



| Source protein                          | Interacting partners                                                                                                                                                                                                                                                                                                                                                                                                                                                                                                                                                                                                                                                                                                                                                                                                                                                                                                                                                                                                                                |
|-----------------------------------------|-----------------------------------------------------------------------------------------------------------------------------------------------------------------------------------------------------------------------------------------------------------------------------------------------------------------------------------------------------------------------------------------------------------------------------------------------------------------------------------------------------------------------------------------------------------------------------------------------------------------------------------------------------------------------------------------------------------------------------------------------------------------------------------------------------------------------------------------------------------------------------------------------------------------------------------------------------------------------------------------------------------------------------------------------------|
| <p style="text-align: center;">PCNA</p> | <p>LIG1<br/>                     RAD23B<br/>                     DDB2<br/>                     GTF2H1<br/>                     ERCC1<br/>                     XAB2<br/>                     GTF2H4<br/>                     GTF2H2<br/>                     CDK7<br/>                     DDB1<br/>                     XPA<br/>                     RBX1<br/>                     XRCC1<br/>                     CUL4A<br/>                     PARP1<br/>                     LIG3<br/>                     POLK<br/>                     RPA3<br/>                     POLE<br/>                     RPA2<br/>                     RPA1<br/>                     NEIL3<br/>                     CSB<br/>                     MUTYH<br/>                     XPB<br/>                     CSA<br/>                     XPF<br/>                     UNG<br/>                     APEX1<br/>                     XPG<br/>                     POLB<br/>                     FEN1<br/>                     POLD4<br/>                     POLD3</p> |
| <p style="text-align: center;">RBX1</p> | <p>ERCC1</p>                                                                                                                                                                                                                                                                                                                                                                                                                                                                                                                                                                                                                                                                                                                                                                                                                                                                                                                                                                                                                                        |
| <p style="text-align: center;">DDB1</p> | <p>XRCC1<br/>                     GTF2H1<br/>                     POLK<br/>                     RPA3<br/>                     CDK7<br/>                     RPA1<br/>                     GTF2H4<br/>                     ERCC1<br/>                     LIG1<br/>                     XPC<br/>                     RBX1<br/>                     DDB2<br/>                     APEX1<br/>                     UNG<br/>                     XPB</p>                                                                                                                                                                                                                                                                                                                                                                                                                                                                                                                                                                                                 |

| Source protein | Interacting partners                                                                                                                                                                                                      |
|----------------|---------------------------------------------------------------------------------------------------------------------------------------------------------------------------------------------------------------------------|
|                | CSA<br>POLD3                                                                                                                                                                                                              |
| CUL4A          | RPA3<br>XPA<br>GTF2H2<br>POLE<br>CDK7 XPC<br>RPA2<br>PARP1<br>CETN2<br>XRCC1<br>ERCC1<br>GTF2H1<br>RPA1<br>POLK<br>XAB2<br>GTF2H4<br>RAD23B<br>LIG1<br>DDB2<br>RBX1<br>DDB1<br>XPF<br>XPB<br>XPG<br>CSA<br>POLD4<br>POLD3 |
| POLK           | RPA3<br>RBX1<br>ERCC1                                                                                                                                                                                                     |
| PARP1          | XRCC1<br>GTF2H2<br>GTF2H1<br>CDK7<br>POLE<br>RBX1<br>GTF2H4<br>POLK<br>ERCC1<br>DDB1<br>RAD23B<br>RPA3<br>RPA1<br>DDB2<br>XPC<br>CSB<br>XPF<br>XPB                                                                        |

| Source protein | Interacting partners                            |
|----------------|-------------------------------------------------|
|                | XPG<br>APEX1<br>FEN1<br>POLB<br>POLD4<br>POLD3  |
| MUTYH          | POLE<br>RPA1<br>APEX1                           |
| CSB            | OGG1<br>XPF<br>XPG                              |
| SMUG1          | APEX1                                           |
| MBD4           | APEX1                                           |
| MPG            | APEX1                                           |
| NEIL2          | XRCC1<br>POLB                                   |
| TDG            | PCNA<br>APEX1                                   |
| OGG1           | XPC<br>NEIL2<br>APEX1                           |
| NTHL1          | APEX1                                           |
| NEIL1          | NEIL2<br>OGG1<br>PNKP<br>XRCC1<br>POLB          |
| PNKP           | NEIL2<br>POLB<br>XRCC1                          |
| PARG           | PCNA<br>POLB<br>APEX1<br>FEN1<br>PARP1          |
| POLB           | RPA1<br>RPA3<br>LIG1<br>APEX1<br>XRCC1<br>POLD3 |
| CSA            | POLK<br>ERCC1                                   |

| Source protein | Interacting partners                                                                                                                                       |
|----------------|------------------------------------------------------------------------------------------------------------------------------------------------------------|
|                | XRCC1<br>RPA1<br>GTF2H4<br>RPA3<br>LIG1<br>CDK7<br>DDB2<br>RBX1<br>POLD3                                                                                   |
| XPF            | XRCC1<br>NTHL1<br>DDB2<br>RPA3<br>CSA<br>RBX1<br>DDB1<br>GTF2H4<br>CDK7<br>XPB<br>POLK<br>RPA1<br>GTF2H1<br>XPC<br>ERCC1<br>POLD3                          |
| XPG            | NTHL1<br>CSA<br>RBX1<br>DDB2<br>XPC<br>RPA3<br>DDB1<br>POLK<br>POLE<br>RPA1<br>XPF<br>GTF2H4<br>CDK7<br>ERCC1<br>XPB<br>GTF2H1<br>GTF2H2<br>POLD4<br>POLD3 |
| XPB            | XRCC1<br>RPA3<br>ERCC1<br>CSA<br>DDB2                                                                                                                      |

| Source protein | Interacting partners                                                                                                                                                                                                                                                  |
|----------------|-----------------------------------------------------------------------------------------------------------------------------------------------------------------------------------------------------------------------------------------------------------------------|
|                | RBX1<br>POLK<br>RPA1<br>LIG1<br>XPC<br>GTF2H1<br>CDK7<br>GTF2H4<br>POLD3                                                                                                                                                                                              |
| FEN1           | UNG<br>ERCC1<br>XRCC1<br>POLB<br>APEX1<br>RPA1<br>RPA3<br>LIG1<br>POLD3                                                                                                                                                                                               |
| POLD2          | FEN1<br>DDB2<br>XPA<br>GTF2H5<br>GTF2H3<br>CUL4A<br>GTF2H2<br>RBX1<br>GTF2H1<br>ERCC1<br>DDB1<br>CDK7<br>POLK<br>GTF2H4<br>XPD<br>RPA3<br>XRCC1<br>XAB2<br>PARP1<br>LIG3<br>RFC1<br>RPA2<br>LIG1<br>POLE<br>RPA1<br>PCNA<br>UNG<br>MUTYH<br>CSA<br>XPB<br>POLB<br>XPF |

| Source protein | Interacting partners                                                                                                                                                               |
|----------------|------------------------------------------------------------------------------------------------------------------------------------------------------------------------------------|
|                | <p>APEX1<br/>XPG<br/>POLD4<br/>POLD3<br/>POLD1</p>                                                                                                                                 |
| <p>POLD4</p>   | <p>DDB2<br/>CDK7<br/>LIG1<br/>XRCC1<br/>POLK<br/>GTF2H4<br/>RPA3<br/>GTF2H1<br/>DDB1<br/>RBX1<br/>ERCC1<br/>RPA1<br/>POLB<br/>APEX1<br/>FEN1<br/>XPB<br/>CSA<br/>XPF<br/>POLD3</p> |
| <p>POLD3</p>   | <p>APEX1<br/>GTF2H4<br/>ERCC1<br/>CDK7<br/>DDB2<br/>RBX1<br/>RPA3<br/>XRCC1<br/>RPA1<br/>LIG1<br/>POLK</p>                                                                         |

| Source protein                            | Interacting partners                                                                                                                                                                                                                                                                                                                                                                         |
|-------------------------------------------|----------------------------------------------------------------------------------------------------------------------------------------------------------------------------------------------------------------------------------------------------------------------------------------------------------------------------------------------------------------------------------------------|
| <p style="text-align: center;">POLD1</p>  | <p>RPA1<br/> POLD3<br/> PCNA<br/> CETN2<br/> RBX1<br/> GTF2H2<br/> CUL4A<br/> DDB2<br/> RAD23B<br/> GTF2H1<br/> CDK7<br/> GTF2H4<br/> XPD<br/> MUTYH<br/> DDB1<br/> CSB<br/> PARP1<br/> CSA<br/> XPA<br/> XPB<br/> XPC<br/> POLB<br/> ERCC1<br/> APEX1<br/> XAB2<br/> XPG<br/> LIG3<br/> XPF<br/> FEN1<br/> XRCC1<br/> POLK<br/> RFC1<br/> RPA2<br/> LIG1<br/> POLD4<br/> POLE<br/> RPA3</p> |
| <p style="text-align: center;">XAB2</p>   | <p>CCNH<br/> MNAT1</p>                                                                                                                                                                                                                                                                                                                                                                       |
| <p style="text-align: center;">PARP1</p>  | <p>MNAT1<br/> CCNH</p>                                                                                                                                                                                                                                                                                                                                                                       |
| <p style="text-align: center;">RAD23B</p> | <p>CCNH<br/> MNAT1</p>                                                                                                                                                                                                                                                                                                                                                                       |
| <p style="text-align: center;">XPA</p>    | <p>MNAT1<br/> CCNH</p>                                                                                                                                                                                                                                                                                                                                                                       |
| <p style="text-align: center;">POLD4</p>  | <p>CCNH<br/> MNAT1</p>                                                                                                                                                                                                                                                                                                                                                                       |

| Source protein | Interacting partners                                                    |
|----------------|-------------------------------------------------------------------------|
| XRCC1          | MNAT1<br>CCNH                                                           |
| LIG3           | CCNH<br>MNAT1                                                           |
| POLE           | CCNH<br>MNAT1                                                           |
| DDB2           | CCNH                                                                    |
| RFC1           | MNAT1<br>CCNH                                                           |
| XPC            | MNAT1<br>CCNH                                                           |
| CETN2          | MNAT1<br>CCNH                                                           |
| DDB1           | MNAT1<br>CCNH                                                           |
| CUL4A          | CCNH<br>MNAT1                                                           |
| POLD1          | MNAT1<br>CCNH                                                           |
| POLD2          | MNAT1<br>CCNH                                                           |
| POLD3          | MNAT1<br>CCNH                                                           |
| GTF2H4         | CCNH                                                                    |
| RPA2           | MNAT1<br>CCNH                                                           |
| MNAT1          | DDB2<br>POLK<br>ERCC1<br>RPA1<br>RPA3<br>RBX1<br>GTF2H4<br>CCNH<br>CDK7 |
| LIG1           | MNAT1<br>CCNH                                                           |
| PCNA           | CCNH<br>MNAT1                                                           |
| GTF2H5         | MNAT1<br>CCNH                                                           |
| GTF2H1         | MNAT1<br>CCNH                                                           |



| Source protein | Interacting partners                          |
|----------------|-----------------------------------------------|
| GTF2H3         | MNAT1<br>CCNH                                 |
| CCNH           | POLK<br>ERCC1<br>RBX1<br>RPA1<br>RPA3<br>CDK7 |
| GTF2H2         | MNAT1<br>CCNH                                 |
